# Supplementary material for: Chemical conjugation to differentiate monosaccharides by Raman and surface enhanced Raman spectroscopy
Source: Royal Society of Chemistry journal article supplement (doi:10.1039/d2an01762h), 2023-01-01
Supplement: d2an01762h1.pdf [file d2an01762h1.pdf]

**Electronic Supplementary Information:** Chemical Conjugation to Differentiate Monosaccharides  
by Raman and Surface Enhanced Raman Spectroscopy

Hannah C. Schorr and Zachary D. Schultz\*

Department of Chemistry and Biochemistry, The Ohio State University, Columbus, OH 43210

\*corresponding author email: [Schultz.133@osu.edu](mailto:Schultz.133@osu.edu)

Contents:

Table S1. Instrument sensitivity comparison

Figure S1. Instrument sensitivity comparison

Figure S2. PCA components for Figure 5

Figure S3. Spectra of 1 Phenylboronic acid and Glucose-PBA conjugate in flow

Figure S4. PCA components for Figure 8

Table S1: Instrument sensitivity comparisons

| Instrument  | LOD of ethanol | Equation of normalized Line | R <sup>2</sup> for fit |
|-------------|----------------|-----------------------------|------------------------|
| Snowy Range | 39 mM          | $y = 0.9221x + 0.0012$      | 0.9991                 |
| Home Built  | 20 mM          | $y = 0.9146x + 0.0168$      | 0.9998                 |
| Renishaw    | 40 mM          | $y = 0.9153x - 0.0617$      | 0.9993                 |

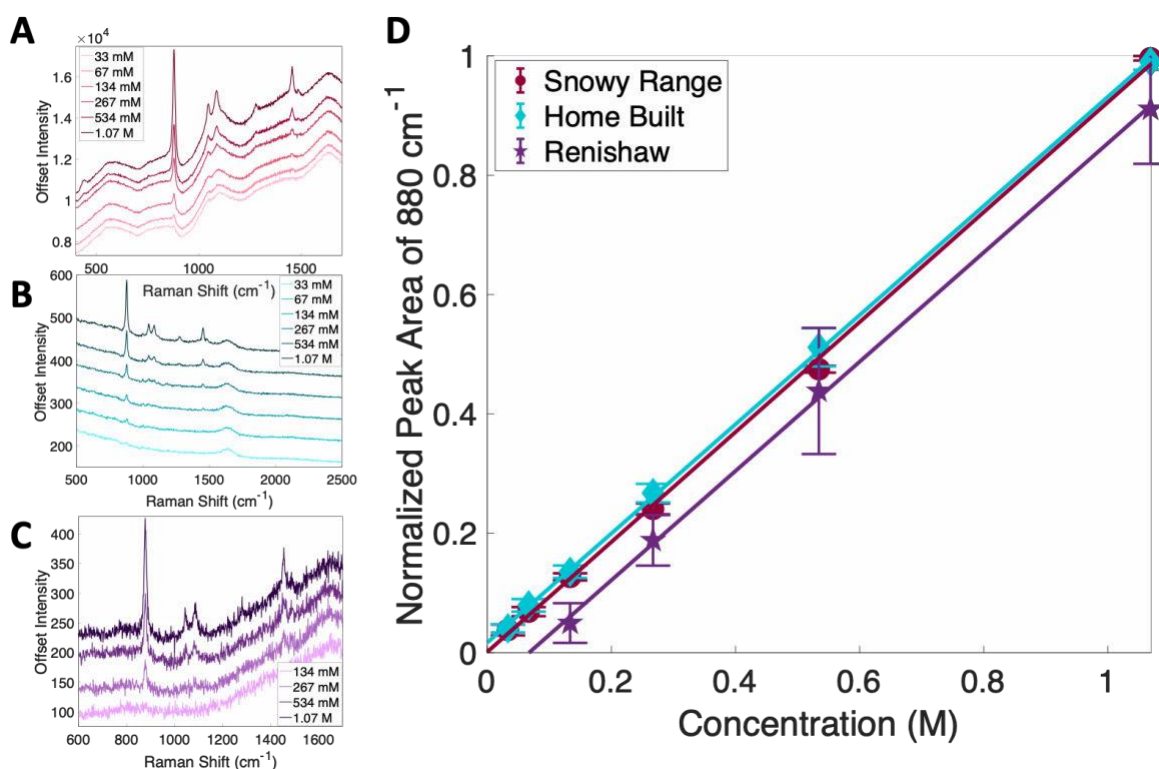

Figure S1: Comparison of instrument-to-instrument sensitivity. (A) Raman spectra of ethanol collected from the Snowy Range spectrometer. (B) Raman spectra of ethanol collected from the homebuilt instrument. (C) Raman spectra of ethanol collected from the Renishaw spectrometer. (D) Normalized peak area of the peak at 880 cm<sup>-1</sup> for each instrument. Error bars indicate standard deviation of replicate measurements.

To demonstrate the sensitivity limits of the three instruments used, the spontaneous Raman limit of detection for ethanol was collected on each. The limits of detection found are shown in **Table S1**. The spectra collected to determine these limits of detection are shown in **Figure S1A** for the Snowy Range, **Figure S1B** for the home built instrument, and **Figure S1C** for the Renishaw. **Figure S1D** shows the normalized peak area of the 880 cm<sup>-1</sup> peak at varying ethanol concentrations for all three instruments. All three instruments exhibited similar spontaneous limits of detection for ethanol. Additionally, the slope of all three lines are approximately equal, indicating that the instruments have similar nominal sensitivity.

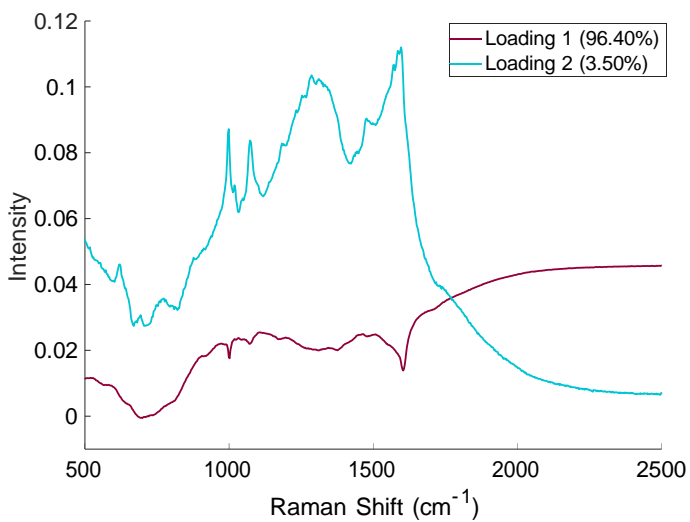

Figure S2: PCA Loadings for Figure 5B.

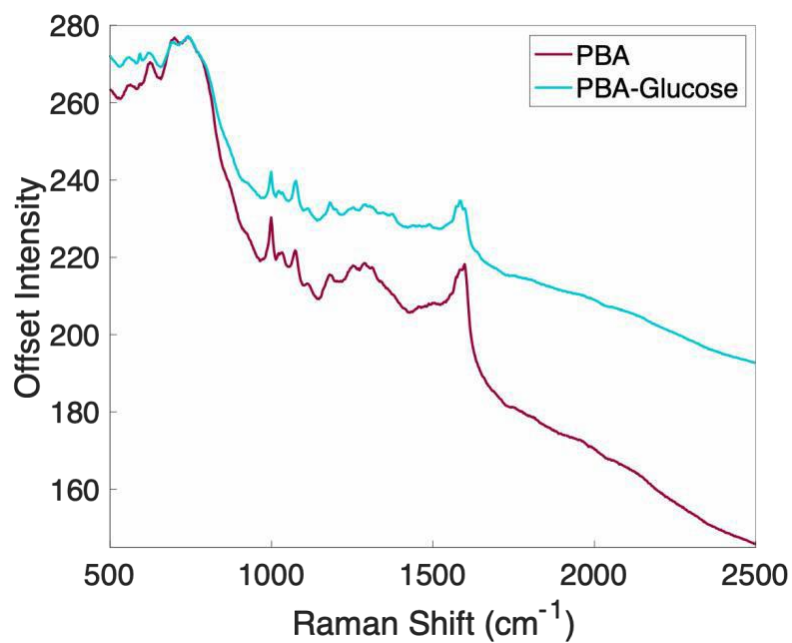

Figure S3: PBA and PBA-Glucose conjugate flowing over a silver substrate.

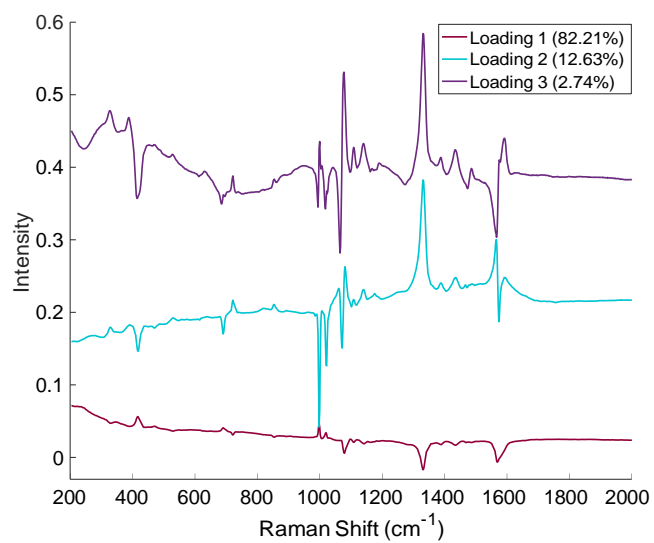

Figure S4: PCA Loadings for Figure 8
